# Supplementary material
Source: PubMed Central journal article supplement (PMC5400707)
Supplement: NIHMS833614-supplement-supplement_1.pdf [file NIHMS833614-supplement-supplement_1.pdf]

Supplemental Table 1. Proportions of men of each race presenting with distant *de novo* metastatic PCa by year of diagnosis from 2004-2012.

|                    | 2004 | 2005 | 2006 | 2007 | 2008 | 2009 | 2010 | 2011 | 2012 |
|--------------------|------|------|------|------|------|------|------|------|------|
| White Non-Hispanic | 3.8% | 4.1% | 3.8% | 3.5% | 3.8% | 3.8% | 4.2% | 4.2% | 5.5% |
| White Hispanic     | 5.3% | 5.6% | 4.8% | 4.9% | 5.0% | 5.5% | 5.5% | 6.0% | 6.9% |
| Black              | 5.4% | 5.8% | 5.5% | 4.7% | 5.2% | 5.2% | 5.5% | 5.5% | 6.3% |
| Asian/PI           | 4.9% | 5.0% | 5.1% | 4.7% | 5.7% | 5.2% | 4.8% | 4.6% | 6.6% |
| AI/AK              | 9.0% | 5.6% | 8.1% | 6.4% | 7.2% | 9.5% | 9.4% | 8.2% | 9.8% |
| Unknown            | 1.5% | 2.2% | 1.4% | 0.8% | 0.9% | 0.8% | 1.3% | 0.8% | 1.0% |
